# Supplementary material for: Fast Response GaAs Photodetector Based on Constructing Electron Transmission Channel
Source: MDPI journal article supplement (doi:10.3390/cryst11101160), 2021-09-23
Supplement: s1 [file s1]

# Fast Response GaAs Photodetector Base on Constructing Electron Transmission Channel

Shuai Guo,<sup>a</sup> Xue Chen,<sup>a</sup> Dengkui Wang,<sup>a</sup> \* Xuan Fang,<sup>a</sup> Dan Fang,<sup>a</sup> Jilong Tang,<sup>a</sup> Lei Liao<sup>b,c</sup> and Zhipeng Wei<sup>a</sup> \*

*a. State Key Laboratory of High Power Semiconductor Lasers, Changchun University of Science and Technology, 7089 Wei-Xing Road, Changchun 130022, China.*

*b. Department of Physics and Key Laboratory of Artificial Micro-and Nano-structures of Ministry of Education, Wuhan University, Wuhan 430072, China.*

*c. State Key Laboratory for Chemo/Biosensing and Chemometrics, School of Physics and Electronics, Hunan University, Changsha 410082, China.*

\* E-mail: wccwss@foxmail.com; zpweicust@126.com

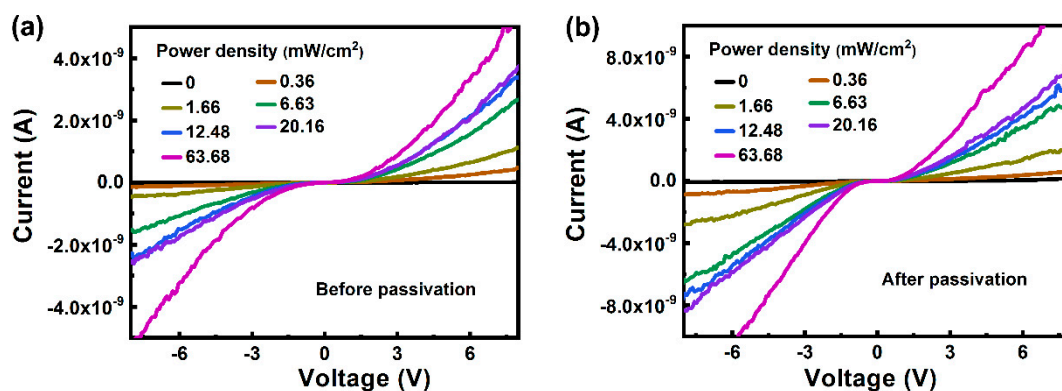

**Figure S1.** The I-V characteristic curves of the GaAs 2DNLS photodetector under different power densities (a) before and (b) after passivation.
